# Supplementary material for: Inhibition of Erythromycin and Erythromycin-Induced Resistance among Staphylococcus aureus Clinical Isolates
Source: MDPI journal article supplement (doi:10.3390/antibiotics12030503), 2023-03-02
Supplement: s1 [file s1]

Antibiotics

## **Inhibition of Erythromycin and Erythromycin-Induced Resistance Among *Staphylococcus aureus* Clinical Isolates**

Aya A. Mahfouz <sup>a,c</sup>, Heba S. Said <sup>a</sup>, Sherin M. Elfeky <sup>b</sup>, Mona I. Shaaban <sup>a\*</sup>

<sup>a</sup> Department of Microbiology and Immunology, Faculty of Pharmacy, Mansoura University, Mansoura 35516, Egypt.

<sup>b</sup> Department of Pharmaceutical Organic Chemistry, Faculty of Pharmacy, Mansoura University, Mansoura 35516, Egypt.

<sup>c</sup> Department of Microbiology and Immunology, Faculty of Pharmacy, Horus University-Egypt, New Damietta 34518, Egypt.

\* Corresponding author: Mona I. Shaaban

E-mail addresses: mona\_ibrahem@mans.edu.eg; sarafawzy2002@yahoo.com

Telephone: 01066944268

**Table S1.** Antimicrobial susceptibility of tested *S. aureus* clinical isolates to different classes of antimicrobial agents.

| Isolate no. | Clinical Source | $\beta$ -lactams |    |     |     |     |     |     | Aminoglycosides |    | Fluoroquinolones |     | Macrolides |     |   | Lincosamides | Streptogramins | Oxazolidinones | MRSA or MSSA |
|-------------|-----------------|------------------|----|-----|-----|-----|-----|-----|-----------------|----|------------------|-----|------------|-----|---|--------------|----------------|----------------|--------------|
|             |                 | AMC              | OX | Fox | CAZ | CTX | FEP | IPM | CN              | AK | CIP              | LEV | CLR        | AZM | E | DA           | RP             | LZD            |              |
| 1           | Wound           | R                | R  | R   | R   | R   | R   | R   | R               | R  | R                | R   | R          | R   | R | R            | R              | S              | MRSA         |
| 2           | Wound           | R                | R  | R   | R   | R   | R   | S   | R               | R  | R                | R   | R          | R   | R | R            | R              | S              | MRSA         |
| 3           | Wound           | R                | R  | R   | R   | R   | R   | S   | R               | S  | S                | S   | R          | R   | R | R            | R              | S              | MRSA         |
| 4           | Wound           | R                | R  | R   | R   | R   | R   | R   | R               | R  | R                | R   | R          | R   | R | R            | R              | S              | MRSA         |
| 5           | Wound           | R                | R  | R   | R   | R   | R   | R   | R               | R  | R                | R   | R          | R   | R | R            | R              | S              | MRSA         |
| 6           | Wound           | R                | R  | R   | R   | R   | R   | R   | R               | R  | R                | R   | R          | R   | R | R            | R              | S              | MRSA         |
| 7           | Wound           | R                | R  | R   | R   | R   | R   | R   | R               | R  | R                | R   | R          | R   | R | R            | R              | S              | MRSA         |
| 8           | Wound           | R                | R  | R   | R   | R   | R   | R   | R               | R  | R                | R   | R          | R   | R | R            | R              | S              | MRSA         |
| 9           | Wound           | R                | R  | R   | R   | R   | R   | S   | R               | I  | R                | R   | R          | R   | R | R            | R              | S              | MRSA         |
| 10          | Wound           | R                | R  | R   | R   | R   | R   | S   | S               | S  | S                | S   | R          | R   | R | S            | R              | S              | MRSA         |
| 11          | Wound           | R                | S  | R   | R   | I   | I   | S   | R               | S  | R                | S   | R          | R   | R | S            | R              | S              | MRSA         |
| 12          | Wound           | R                | I  | R   | R   | R   | R   | S   | R               | R  | R                | S   | R          | R   | R | S            | R              | S              | MRSA         |
| 13          | Wound           | R                | R  | R   | R   | R   | R   | S   | R               | S  | S                | S   | R          | R   | R | S            | R              | S              | MRSA         |
| 14          | Wound           | R                | R  | R   | R   | I   | I   | S   | S               | S  | R                | R   | R          | R   | R | S            | R              | S              | MRSA         |
| 15          | Wound           | R                | R  | R   | R   | I   | R   | S   | S               | S  | S                | S   | R          | R   | R | S            | R              | S              | MRSA         |
| 16          | Wound           | R                | R  | R   | R   | R   | R   | R   | S               | S  | R                | R   | R          | R   | R | S            | R              | S              | MRSA         |
| 17          | Wound           | R                | R  | R   | R   | R   | R   | S   | R               | S  | S                | S   | R          | R   | R | S            | R              | S              | MRSA         |
| 18          | Wound           | R                | I  | R   | R   | R   | R   | S   | S               | S  | S                | S   | R          | R   | R | S            | R              | S              | MRSA         |
| 19          | Wound           | R                | I  | R   | R   | R   | R   | S   | S               | S  | S                | S   | R          | R   | R | S            | R              | S              | MRSA         |
| 20          | Blood           | R                | R  | R   | R   | R   | R   | S   | S               | S  | S                | S   | I          | R   | R | R            | R              | S              | MRSA         |
| 21          | Blood           | R                | R  | R   | R   | R   | R   | R   | R               | R  | R                | R   | R          | R   | R | R            | R              | S              | MRSA         |
| 22          | Blood           | R                | R  | R   | R   | R   | R   | R   | R               | S  | S                | R   | R          | R   | R | R            | R              | S              | MRSA         |
| 23          | Blood           | R                | R  | R   | R   | R   | R   | S   | R               | S  | R                | S   | R          | R   | R | R            | R              | S              | MRSA         |
| 24          | Blood           | R                | R  | R   | R   | R   | R   | R   | R               | R  | R                | R   | R          | R   | R | R            | R              | S              | MRSA         |
| 25          | Blood           | R                | R  | R   | R   | R   | R   | R   | R               | S  | R                | R   | R          | R   | R | R            | R              | S              | MRSA         |
| 26          | Blood           | R                | R  | R   | R   | R   | R   | I   | R               | R  | R                | R   | R          | R   | R | R            | R              | S              | MRSA         |
| 27          | Blood           | R                | R  | R   | R   | R   | R   | S   | S               | S  | I                | S   | R          | R   | R | S            | R              | S              | MRSA         |
| 28          | Skin tissue     | R                | R  | R   | R   | R   | R   | S   | R               | R  | S                | S   | R          | R   | R | S            | R              | S              | MRSA         |
| 29          | Nasal swab      | R                | R  | R   | R   | R   | R   | R   | R               | R  | R                | R   | R          | R   | R | R            | R              | S              | MRSA         |

|    |            |   |   |   |   |   |   |   |   |   |   |   |   |   |   |   |   |      |      |
|----|------------|---|---|---|---|---|---|---|---|---|---|---|---|---|---|---|---|------|------|
| 30 | Nasal swab | R | R | R | R | R | R | R | R | R | R | R | R | R | R | R | R | S    | MRSA |
| 31 | Nasal swab | R | R | R | R | R | R | R | R | R | R | R | R | R | R | R | R | S    | MRSA |
| 32 | Nasal swab | R | R | R | R | S | R | R | R | R | R | R | R | R | R | R | R | S    | MRSA |
| 33 | Nasal swab | R | R | R | R | S | R | R | R | R | R | R | R | R | R | R | R | S    | MRSA |
| 34 | Nasal swab | R | R | R | R | R | R | R | R | R | R | R | R | R | R | R | R | S    | MRSA |
| 35 | Nasal swab | R | R | R | R | R | R | R | R | R | R | R | R | R | R | R | R | S    | MRSA |
| 36 | Nasal swab | R | R | R | R | R | R | R | R | R | S | R | R | R | S | R | S | MRSA |      |
| 37 | Nasal swab | S | R | R | R | R | R | R | R | S | R | S | R | R | R | R | R | S    | MRSA |
| 38 | Nasal swab | S | S | S | R | R | S | S | S | S | S | S | R | R | R | S | R | S    | MSSA |
| 39 | Nasal swab | S | R | R | R | I | S | S | R | S | S | S | R | R | R | R | R | S    | MRSA |
| 40 | Nasal swab | R | R | R | R | I | R | S | S | S | S | S | R | R | R | R | R | S    | MRSA |
| 41 | Nasal swab | S | R | R | R | R | S | S | R | R | R | R | R | R | R | R | R | S    | MRSA |
| 42 | Nasal swab | R | R | R | R | R | R | R | R | R | R | R | R | R | R | R | R | S    | MRSA |
| 43 | Nasal swab | S | R | R | R | R | S | S | S | S | S | S | R | R | R | R | R | S    | MRSA |
| 44 | Nasal swab | R | R | R | R | I | R | R | R | R | R | R | R | R | R | R | R | S    | MRSA |
| 45 | Nasal swab | S | R | R | R | R | R | S | R | S | I | S | R | R | R | R | R | S    | MRSA |
| 46 | Nasal swab | R | R | R | R | R | R | I | R | R | R | R | R | R | R | R | R | S    | MRSA |
| 47 | Nasal swab | R | R | R | R | R | R | R | R | R | R | R | R | R | R | R | R | S    | MRSA |
| 48 | Nasal swab | R | R | R | R | R | R | S | R | R | R | R | R | R | R | R | R | S    | MRSA |
| 49 | Nasal swab | S | R | R | R | R | I | S | S | S | R | R | R | R | R | S | R | S    | MRSA |
| 50 | Nasal swab | R | R | R | R | R | I | S | R | S | S | S | R | R | R | R | R | S    | MRSA |
| 51 | Nasal swab | S | S | R | R | R | I | S | I | S | R | I | R | R | R | S | R | S    | MRSA |
| 52 | Nasal swab | R | R | R | R | R | R | S | S | S | I | S | R | R | R | S | R | S    | MRSA |
| 53 | Wound      | R | R | R | R | R | R | S | R | R | S | S | S | S | S | S | S | S    | MRSA |
| 54 | Wound      | R | R | R | R | R | R | S | R | I | S | S | S | S | S | S | S | S    | MRSA |
| 55 | Wound      | R | R | R | R | I | I | S | R | S | S | S | S | S | S | S | S | S    | MRSA |
| 56 | Wound      | R | R | R | R | I | R | S | R | S | S | S | S | S | S | S | S | S    | MRSA |

|    |       |   |   |   |   |   |   |   |   |   |   |   |   |   |   |   |   |   |      |
|----|-------|---|---|---|---|---|---|---|---|---|---|---|---|---|---|---|---|---|------|
| 57 | Wound | R | R | R | R | I | I | S | S | S | S | S | S | S | S | S | S | S | MRSA |
| 58 | Wound | S | R | R | R | I | I | S | R | S | S | S | S | S | S | S | S | S | MRSA |
| 59 | Wound | R | R | R | R | R | R | S | S | S | I | S | S | S | S | S | S | S | MRSA |
| 60 | Wound | R | R | R | R | I | I | S | S | S | S | S | S | S | S | S | S | S | MRSA |
| 61 | Wound | S | S | S | S | S | S | S | S | S | S | S | S | S | S | S | S | S | MSSA |
| 62 | Wound | R | S | R | R | I | S | S | R | S | S | S | S | S | S | S | S | S | MRSA |
| 63 | Wound | R | S | R | R | I | S | S | R | R | I | S | S | S | S | S | S | S | MRSA |
| 64 | Wound | R | I | R | R | I | I | S | R | R | R | S | S | S | S | S | S | S | MRSA |
| 65 | Wound | R | S | R | R | I | I | S | R | S | S | S | S | S | S | S | S | S | MRSA |
| 66 | Wound | R | R | R | R | R | R | S | R | S | R | R | S | S | S | S | S | S | MRSA |
| 67 | Wound | R | R | R | R | I | R | S | R | R | R | S | S | S | S | S | S | S | MRSA |
| 68 | Wound | R | R | R | R | I | R | S | R | S | R | R | S | S | S | S | S | S | MRSA |
| 69 | Blood | R | S | R | R | I | S | S | R | R | S | S | S | S | S | S | S | S | MRSA |
| 70 | Blood | R | S | R | R | I | I | S | R | S | S | S | S | S | S | S | S | S | MRSA |
| 71 | Blood | R | S | R | I | I | I | S | R | R | S | S | S | S | S | S | S | S | MRSA |
| 72 | Blood | R | S | R | R | I | S | S | S | S | S | S | S | S | S | S | S | S | MRSA |
| 73 | Blood | R | R | R | R | I | I | S | S | S | S | S | S | S | S | S | S | S | MRSA |
| 74 | Blood | S | S | R | R | I | S | S | S | S | S | S | S | S | S | S | S | S | MRSA |
| 75 | Blood | R | S | R | R | I | I | S | S | S | S | S | S | S | S | S | S | S | MRSA |
| 76 | Blood | R | S | R | R | I | S | S | S | S | S | S | S | S | S | S | S | S | MRSA |
| 77 | Blood | R | S | S | S | S | S | S | S | S | S | S | S | S | S | S | S | S | MSSA |
| 78 | Blood | S | S | S | S | S | S | S | R | S | S | S | S | S | S | S | S | S | MSSA |
| 79 | Blood | R | S | R | R | R | R | S | R | S | S | S | S | S | S | S | S | S | MRSA |
| 80 | Blood | R | S | R | R | I | S | S | S | S | S | S | S | S | S | S | S | S | MRSA |
| 81 | Blood | R | R | R | R | R | R | R | R | R | R | R | S | S | S | S | S | S | MRSA |
| 82 | Blood | S | I | R | R | R | S | S | I | S | S | S | S | S | S | S | S | S | MRSA |
| 83 | Blood | S | S | R | R | R | S | S | R | S | S | S | S | S | S | S | S | S | MRSA |
| 84 | Blood | S | I | R | R | R | S | S | S | S | S | S | S | S | S | S | S | S | MRSA |
| 85 | Blood | S | R | R | R | R | S | S | S | S | S | S | S | S | S | S | S | S | MRSA |
| 86 | Blood | S | S | R | R | R | S | S | S | S | S | S | S | S | S | S | S | S | MRSA |
| 87 | Blood | R | R | R | R | R | R | R | R | R | R | R | S | S | S | S | S | S | MRSA |
| 88 | Blood | R | R | R | R | R | R | S | S | S | R | S | S | S | S | S | S | S | MRSA |
| 89 | Blood | S | S | S | R | R | S | S | S | S | S | S | S | S | S | S | S | S | MSSA |
| 90 | Blood | R | R | R | R | R | R | R | R | R | R | R | S | S | S | S | S | S | MRSA |
| 91 | B A L | R | S | R | R | S | S | S | S | S | S | S | S | S | S | S | S | S | MRSA |

Isolate no.: the number of isolate, AMC: amoxicillin-clavulanic acid, OX: oxacillin, FOX: cefoxitin, CAZ: ceftazidime, CTX: cefotaxime, FEP: cefepime, IPM: imipenem, CN: gentamicin, AK: amikacin, CIP: ciprofloxacin, LEV: levofloxacin, CLR: clarithromycin, AZM: azithromycin, E: erythromycin, DA: clindamycin, RP: quinapristin/dalfopristin, LZD: linezolid, MRSA: methicillin resistant *S. aureus*, MSSA: methicillin sensitive *S. aureus*, MDR: multidrug-resistant, XDR: extensively drug-resistant, PDR: pandrug-resistant, S: susceptible, I: intermediate, R: resistant, BAL: broncho-alveolar lavage.

**Table S2.** Effect of different tested compounds on erythromycin resistance against *S. aureus* isolate no. 10 (D phenotype).

| Isolate no.    | MIC of E (µg/mL) | The effect of tested compounds on erythromycin resistance |              |                            |                                                 |             |
|----------------|------------------|-----------------------------------------------------------|--------------|----------------------------|-------------------------------------------------|-------------|
|                |                  | Tested compound                                           | MICs (µg/mL) | Conc. of inhibitor (µg/mL) | MICs of E in combination with inhibitor (µg/mL) | Fold change |
| Isolate no. 10 | 1750             | CCCP                                                      | 0.5          | 0.25                       | 1750                                            | —           |
|                |                  | Caffeine                                                  | 22,000       | 2,750                      | 875                                             | 2-fold ↓    |
|                |                  | Quinine                                                   | 1250         | 625                        | 437.5                                           | 4-fold ↓    |
|                |                  | Quinidine                                                 | 625          | 312.5                      | 875                                             | 2-fold ↓    |
|                |                  | Emetine                                                   | 6250         | 3125                       | 875                                             | 2-fold ↓    |
|                |                  | Candidase                                                 | 97.656       | 48.828                     | 875                                             | 2-fold ↓    |
|                |                  | Piperine                                                  | 20,000       | 5000                       | 875                                             | 2-fold ↓    |
|                |                  | Fosfomycin                                                | 2            | 1                          | 437.5                                           | 4-fold ↓    |
|                |                  | Neomycin                                                  | 1            | 0.5                        | 109.375                                         | 16-fold ↓   |
|                |                  | Ciprofloxacin                                             | 0.25         | 0.125                      | 875                                             | 2-fold ↓    |
|                |                  | Doxorubicin                                               | 8            | 4                          | 218.75                                          | 8-fold ↓    |
|                |                  | 5-Fluorouracil                                            | 0.5          | 0.25                       | 875                                             | 2-fold ↓    |
|                |                  | Cisplatin                                                 | 128          | 64                         | 875                                             | 2-fold ↓    |
|                |                  | Meloxicam                                                 | 2048         | 1024                       | 437.5                                           | 4-fold ↓    |
|                |                  | Ketoprofen                                                | 3125         | 1562.5                     | 218.75                                          | 8-fold ↓    |
|                |                  | Omeprazole                                                | 625          | 312.5                      | 875                                             | 2-fold ↓    |
|                |                  | Vitamin D3                                                | 1024         | 512                        | 875                                             | 2-fold ↓    |
|                |                  | Vitamin K                                                 | 2500         | 1250                       | 875                                             | 2-fold ↓    |
|                |                  | Verapamil                                                 | 1024         | 512                        | 875                                             | 2-fold ↓    |
|                |                  | Digoxin                                                   | 62.5         | 31.25                      | 875                                             | 2-fold ↓    |
|                |                  | Diazepam                                                  | 256          | 128                        | 875                                             | 2-fold ↓    |

**Table S3.** Effect of different tested compounds on erythromycin resistance against *S. aureus* isolate no. 36 (MS phenotype).

| Isolate no.    | MIC of E (µg/mL) | The effect of tested compounds on erythromycin resistance |              |                            |                                                 |             |
|----------------|------------------|-----------------------------------------------------------|--------------|----------------------------|-------------------------------------------------|-------------|
|                |                  | Tested compound                                           | MICs (µg/mL) | Conc. of inhibitor (µg/mL) | MICs of E in combination with inhibitor (µg/mL) | Fold change |
| Isolate no. 36 | 100              | CCCP                                                      | 2            | 1                          | 25                                              | 4-fold ↓    |
|                |                  | Caffeine                                                  | 22,000       | 2,750                      | 25                                              | 4-fold ↓    |
|                |                  | Quinine                                                   | 625          | 312.5                      | 100                                             | —           |
|                |                  | Quinidine                                                 | 625          | 312.5                      | 50                                              | 2-fold ↓    |
|                |                  | Emetine                                                   | 6250         | 3125                       | 50                                              | 2-fold ↓    |
|                |                  | Candidase                                                 | 58.594       | 29.297                     | 100                                             | —           |
|                |                  | Piperine                                                  | 20,000       | 5000                       | 100                                             | —           |
|                |                  | Fosfomycin                                                | 4            | 2                          | 50                                              | 2-fold ↓    |
|                |                  | Neomycin                                                  | 64           | 32                         | 0.781                                           | 128-fold ↓  |
|                |                  | Ciprofloxacin                                             | 32           | 16                         | 50                                              | 2-fold ↓    |
|                |                  | Doxorubicin                                               | 4            | 2                          | 50                                              | 2-fold ↓    |
|                |                  | 5-Fluorouracil                                            | 0.125        | 0.0625                     | 100                                             | —           |
|                |                  | Cisplatin                                                 | 1000         | 500                        | 100                                             | —           |
|                |                  | Meloxicam                                                 | 1024         | 512                        | 12.5                                            | 8-fold ↓    |
|                |                  | Ketoprofen                                                | 3125         | 1562.5                     | 12.5                                            | 8-fold ↓    |
|                |                  | Omeprazole                                                | 5000         | 2500                       | 12.5                                            | 8-fold ↓    |
|                |                  | Vitamin D3                                                | 1024         | 512                        | 100                                             | —           |
|                |                  | Vitamin K                                                 | 2500         | 1250                       | 100                                             | —           |
|                |                  | Verapamil                                                 | 625          | 312.5                      | 50                                              | 2-fold ↓    |
|                |                  | Digoxin                                                   | 62.5         | 31.25                      | 100                                             | —           |
|                |                  | Diazepam                                                  | 128          | 64                         | 100                                             | —           |

Isolate no.: number of isolate, E: erythromycin, conc.: concentration, ↓: decrease.

**Table S4.** Effect of different tested compounds on inducible clindamycin resistance against *S. aureus* isolate no. 10 (D phenotype).

| Isolate no.    | ICR        |              |             | Inhibition of ICR |              |                            |                                                    |             |
|----------------|------------|--------------|-------------|-------------------|--------------|----------------------------|----------------------------------------------------|-------------|
|                | DA (µg/mL) | DA/E (µg/mL) | Fold change | Tested compound   | MICs (µg/mL) | Conc. of inhibitor (µg/mL) | MICs of DA/E in combination with inhibitor (µg/mL) | Fold change |
| Isolate no. 10 | 0.0625     | 1            | 16-fold↑    | CCCP              | 0.5          | 0.25                       | 1                                                  | —           |
|                |            |              |             | Caffeine          | 22,000       | 2,750                      | 0.5                                                | 2-fold ↓    |
|                |            |              |             | Quinine           | 1250         | 625                        | 0.25                                               | 4-fold ↓    |
|                |            |              |             | Quinidine         | 625          | 312.5                      | 0.5                                                | 2-fold ↓    |
|                |            |              |             | Emetine           | 6250         | 3125                       | 1                                                  | —           |
|                |            |              |             | Candidase         | 97.656       | 48.828                     | 0.5                                                | 2-fold ↓    |
|                |            |              |             | Piperine          | 20,000       | 5000                       | 0.5                                                | 2-fold ↓    |
|                |            |              |             | Fosfomycin        | 2            | 1                          | 0.25                                               | 4-fold ↓    |
|                |            |              |             | Neomycin          | 1            | 0.5                        | 0.5                                                | 2-fold ↓    |
|                |            |              |             | Ciprofloxacin     | 0.25         | 0.125                      | 0.5                                                | 2-fold ↓    |
|                |            |              |             | Doxorubicin       | 8            | 4                          | 0.5                                                | 2-fold ↓    |
|                |            |              |             | 5-Fluorouracil    | 0.5          | 0.25                       | 1                                                  | —           |
|                |            |              |             | Cisplatin         | 128          | 64                         | 0.5                                                | 2-fold ↓    |
|                |            |              |             | Meloxicam         | 2048         | 1024                       | 0.5                                                | 2-fold ↓    |
|                |            |              |             | Ketoprofen        | 3125         | 1562.5                     | 0.25                                               | 4-fold ↓    |
|                |            |              |             | Omeprazole        | 625          | 312.5                      | 0.5                                                | 2-fold ↓    |
|                |            |              |             | vitamin D3        | 1024         | 512                        | 1                                                  | —           |
|                |            |              |             | Vitamin K         | 2500         | 1250                       | 1                                                  | —           |
|                |            |              |             | Verapamil         | 1024         | 512                        | 0.5                                                | 2-fold ↓    |
|                |            |              |             | Digoxin           | 62.5         | 31.25                      | 0.5                                                | 2-fold ↓    |
|                |            |              |             | Diazepam          | 256          | 128                        | 0.5                                                | 2-fold ↓    |

Isolate no.: number of isolate, ICR: inducible clindamycin resistance, E: erythromycin, DA: clindamycin,

↑: increase, conc.: concentration, ↓:decrease.

**Table S5.** Docking results for sinefungin and doxorubicin binding at ErmC` protein (PDB ID: 1QAQ).

| Compound           | Docking score ( $\Delta G$ )<br>(kcal/mol) | H-bond (length Å)                                                                                        | Hydrophobic interactions                                                                 |
|--------------------|--------------------------------------------|----------------------------------------------------------------------------------------------------------|------------------------------------------------------------------------------------------|
| <b>Sinefungin</b>  | -9.75                                      | Glu38 (2.96)<br>Glu59 (2.4, 2.65)<br>Asn101 (2.89, 2.55)<br>Ile85 (2.98)<br>Ile13 (3.02)<br>Asp84 (3.39) | Pro103<br>Asn101<br>Asn11<br>Gly38<br>Gln10<br>Ile60<br>Ile106                           |
| <b>Doxorubicin</b> | -7.59                                      | Glu38 (2.62)<br>Glu59 (2.96)<br>Asn11 (2.84)<br>Ile58 (2.95)<br>Ile60 (3.29)<br>Gly40 (3.56)             | Pro103<br>Asn101<br>Asn11<br>Gly38<br>Gln10<br>Ile60<br>Ile106<br>Ile85<br>Asp61<br>Ser9 |



**Table S6.** Docking results for erythromycin, neomycin and omeprazole binding at MsrA protein (UniProtKB ID: Q9ZNK9).

| Compound     | Docking score ( $\Delta G$ )<br>(kcal/mol) | H-bond (length Å)                                                                       | Hydrophobic interactions                                                                                   |
|--------------|--------------------------------------------|-----------------------------------------------------------------------------------------|------------------------------------------------------------------------------------------------------------|
| Erythromycin | -5.91                                      | Glu449 (3.54)<br>Met450 (3.4)                                                           | Glu446<br>Met450<br>Tyr280<br>Gln189<br>Tyr192<br>Ile442<br>Glu193<br>Gln196<br>Leu197<br>His471<br>Glu282 |
| Neomycin     | -7.21                                      | Glu449 (3.21)<br>Met450 (3.14)<br>Glu446 (3.23)<br>Lys443 (3.15)<br>Asp171 (3.44, 3.55) | Glu446<br>Met450<br>Tyr280<br>Gln189<br>Tyr192<br>Ile442<br>Glu193<br>Lys443                               |
| Omeprazole   | -6.93                                      | Glu446 (2.9)                                                                            | Glu446<br>Tyr280<br>Tyr192<br>Ile442<br>Glu193<br>Gln196<br>Lys443<br>Gly38<br>Tyr188                      |

**Table S7.** Docking results for S-adenosyl-L-methionine (SAM), quinine, ketoprofen, and fosfomycin binding at ErmC<sup>+</sup> protein (PDB ID: 1QAO).

| Ligand            | Docking score ( $\Delta G$ )<br>(kcal/mol) | H-bond (length Å)                                                                                         | Hydrophobic interactions                                       |
|-------------------|--------------------------------------------|-----------------------------------------------------------------------------------------------------------|----------------------------------------------------------------|
| <b>SAM</b>        | -8.58                                      | Gly38 (2.66)<br>Glu59 (2.62, 2.44, 3.31)<br>Ile85 (2.91)<br>Ile13 (3.52)<br>Asn101 (2.95)<br>Asp84 (3.01) | Pro103<br>Gly38<br>Ile60<br>Gln10<br>Ile106<br>Asn11<br>Asn101 |
| <b>Quinine</b>    | -6.87                                      | Gly38 (3.25)<br>Glu59 (3.1)                                                                               | Pro103<br>Gly38<br>Ile60<br>Gln10<br>Ile106<br>Asn11<br>Asn101 |
| <b>Ketoprofen</b> | -6.52                                      | Ile85 (3.03)<br>Ile60 (3.43)                                                                              | Pro103<br>Gly38<br>Ile60<br>Gln10<br>Ile106                    |
| <b>Fosfomycin</b> | -4.19                                      | Ile13 (2.99)<br>Asn101 (2.95)<br>Lys41 (2.85)<br>Gly40 (3.84)<br>Phe44 (2.84)                             | —                                                              |

**Table S8.** Primers used for detection of macrolide-lincosamide-streptogramin B (MLS<sub>B</sub>)-resistance determinants.

| Gene name                                                      |             | Type | Nucleotide Sequence (5' to 3')   | AT   | Amplicon size (bp) | Ref        |
|----------------------------------------------------------------|-------------|------|----------------------------------|------|--------------------|------------|
| <b>Erythromycin resistance methylase (<i>erm</i>) genes</b>    | <i>ermC</i> | Fw   | AATCGTCAATTCCTGCATGT             | 57°C | 299                | (1)        |
|                                                                |             | Rv   | TAATCGTGGAATACGGGTTTG            |      |                    |            |
|                                                                | <i>ermA</i> | Fw   | GTTCAAGAACAATCAATACAGAG          | 56°C | 421                | (2)        |
|                                                                |             | Rv   | GGATCAGGAAAAGGACATTTTAC          |      |                    |            |
|                                                                | <i>ermB</i> | Fw   | CGAAATTGGAACAGGTAAAGG            | 53°C | 359                | This study |
|                                                                |             | Rv   | GAATCGAGACTTGAGTGTGC             |      |                    |            |
| <b>Macrolide-streptogramin B resistance (<i>msr</i>) genes</b> | <i>msrA</i> | Fw   | GGCACAATAAGAGTGTTTAAAGG          | 57°C | 940                | (3)        |
|                                                                |             | Rv   | AAGTTATATCATGAATAGATTGTCCTGTT    |      |                    |            |
|                                                                | <i>msrB</i> | Fw   | TATGATATCCATAATAATTATCCAATC      | 50°C | 595                | (3)        |
|                                                                |             | Rv   | AAGTTATATCATGAATAGATTGTCCTGTT    |      |                    |            |
| <b>Lincosamide nucleotidyl-transferase (<i>lnu</i>) genes</b>  | <i>lnuA</i> | Fw   | GGTGGCTGGGGGGTAGATGTATTAAGTGG    | 57°C | 310                | This study |
|                                                                |             | Rv   | GCTTCTTTTGAAATACATGGTATTTTTCGATC |      |                    |            |
|                                                                | <i>lnuB</i> | Fw   | CCTACCTATTGTTTGTGGAA             | 54°C | 943                | (4)        |
|                                                                |             | Rv   | ATAACGTTACTCTCCTATTC             |      |                    |            |
| <b>Macrolide phospho-transferase (<i>mphC</i>) genes</b>       | <i>mphC</i> | Fw   | GAGACTACCAAGAAGACCTGACG          | 56°C | 722                | (5)        |
|                                                                |             | Rv   | CATACGCCGATTCTCCTGAT             |      |                    |            |

Fw: forward, Rv: reverse, AT: annealing temperature, bp: base pair, Ref: reference.

**Table S9.** Different compounds screened for their activity on erythromycin resistance and inducible clindamycin resistance.

| Type of inhibitor       | Name of inhibitor                                       |
|-------------------------|---------------------------------------------------------|
| Efflux pump inhibitors  | CCCP                                                    |
| Natural compounds       | Caffeine<br>Quinine<br>Quinidine<br>Emetine<br>Piperine |
| Antimicrobial agents    | Fosfomycin<br>Neomycin<br>Ciprofloxacin<br>Candidas     |
| Chemotherapeutic agents | Doxorubicin<br>5-Fluorouracil<br>Cisplatin              |
| NSAIDs                  | Meloxicam<br>Ketoprofen                                 |

|                        |                         |
|------------------------|-------------------------|
| Proton pump inhibitors | Omeprazole              |
| Vitamins               | Vitamin D3<br>Vitamin K |
| Antihypertensive drugs | Verapamil<br>Digoxin    |
| Sedatives              | Diazepam                |

CCCP: carbonyl cyanide m-chlorophenylhydrazine, NSAIDs: non-steroidal anti-inflammatory drugs.

(a)

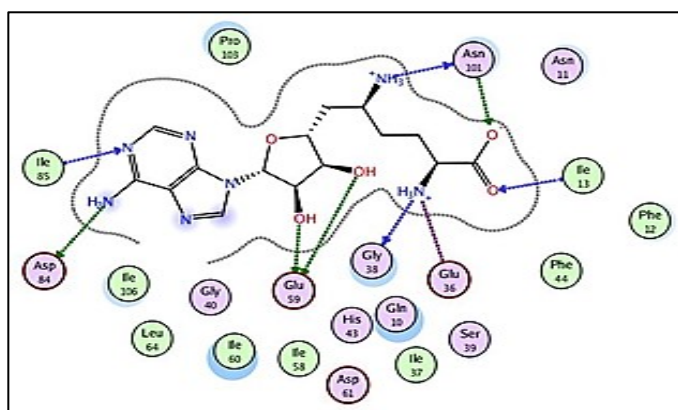

(b)

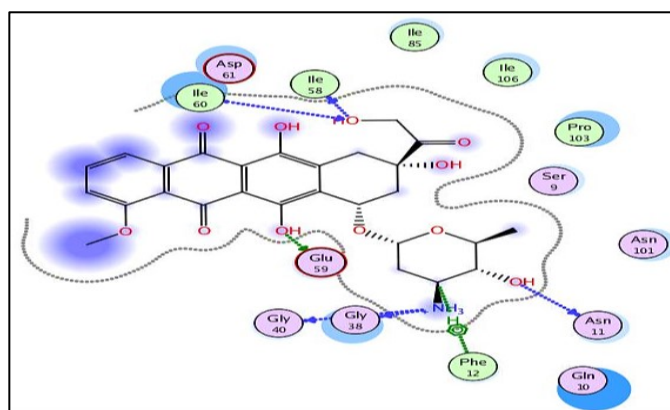

(c)

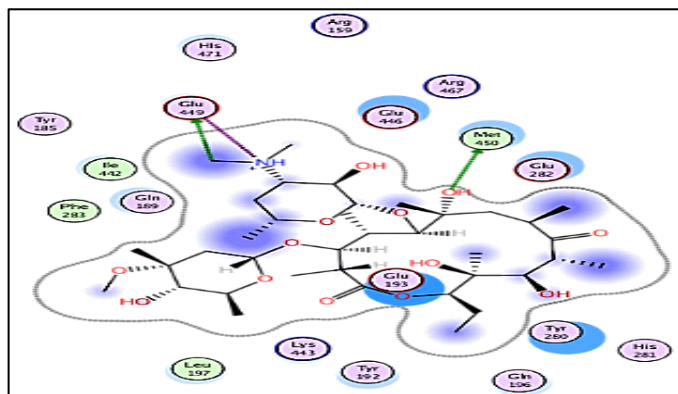

(d)

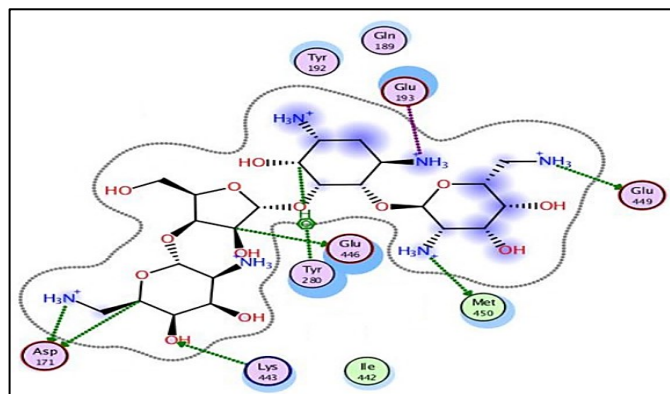

(e)

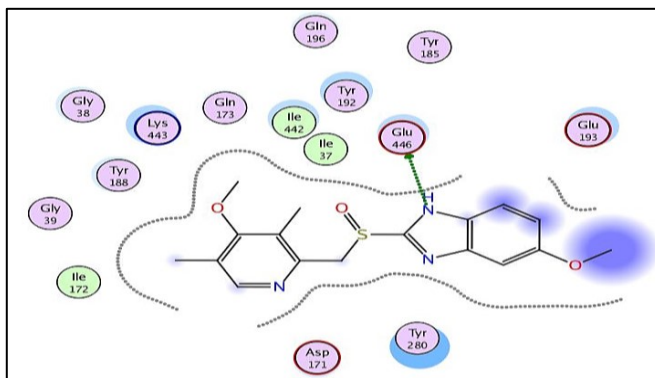

**Figure S1. The 2D interactions of sinefungin and doxorubicin at S-adenosyl-L-methionine (SAM)-binding site of ErmC' protein, and erythromycin, neomycin, and omeprazole at MsrA protein. (a) 2D diagram of sinefungin at SAM-binding site of ErmC' protein. (b) 2D diagram of doxorubicin at SAM-binding site of ErmC'. (c) 2D representation of erythromycin at active site of MsrA protein. (d) 2D representation of neomycin at active site of MsrA. (e) 2D representation of omeprazole at active site of MsrA.**

(a)

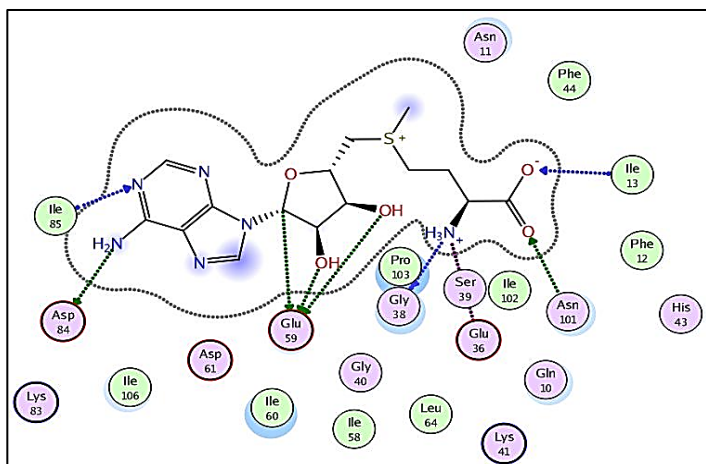

(b)

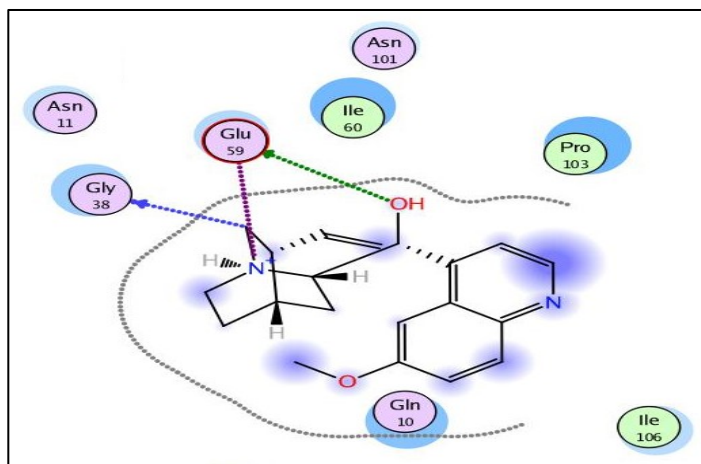

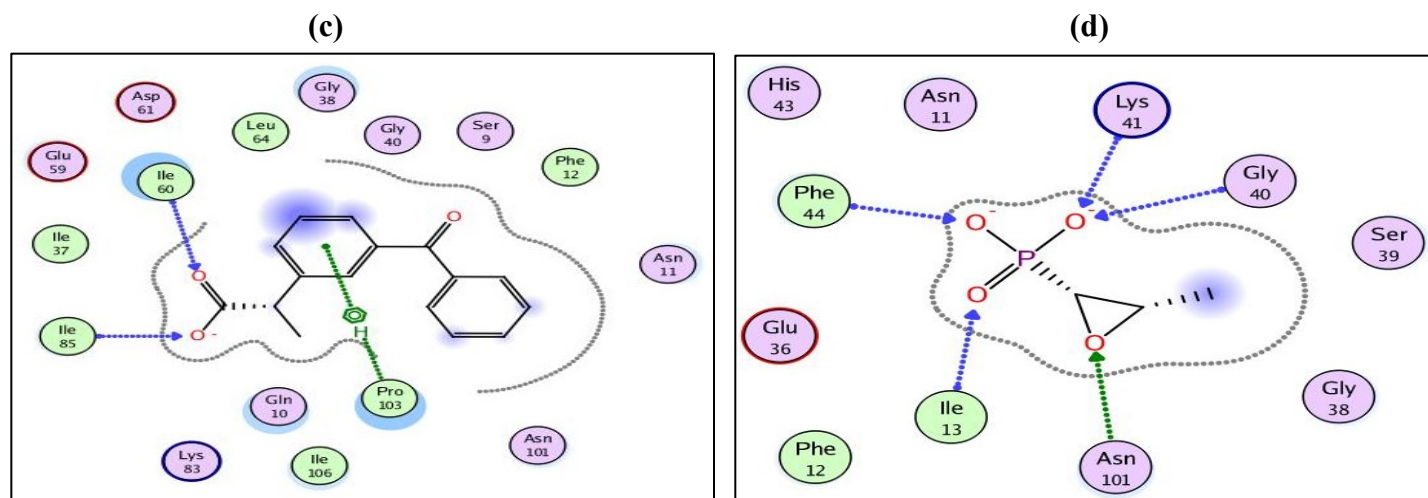

**Figure S2. The 2D interactions of SAM, quinine, ketoprofen, and fosfomycin at SAM-binding site of ErmC' protein. (a) 2D diagram of SAM at SAM-binding site of ErmC' protein. (b) 2D diagram of quinine at SAM-binding site of ErmC'. (c) 2D diagram of ketoprofen at SAM-binding site of ErmC'. (d) 2D diagram of fosfomycin at SAM-binding site of ErmC'.**

## References

1. Strommenger, B.; Kettlitz, C.; Werner, G.; Witte, W. Multiplex PCR assay for simultaneous detection of nine clinically relevant antibiotic resistance genes in *Staphylococcus aureus*. *J. Clin. Microbiol.* **2003**, 41, 4089-94.
2. Leclercq, R.; Bauduret, F.; Soussy, C. Selection of constitutive mutants of gram-positive cocci inducible resistant to macrolides, lincosamides and streptogramins (MLS): comparison of the selective effects of the MLS. *Pathol. Biol.* **1989**, 37, 568-72.
3. Ross, J.; Eady, E.; Cove, J.; Cunliffe, W.; Baumberg, S.; Wootton, J. Inducible erythromycin resistance in staphylococci is encoded by a member of the ATP-binding transport super-gene family. *Mol. Microbiol.* **1990**, 4, 1207-14.
4. Bozdogan, B.I.; Berrezouga, L.; Kuo, M.-S.; Yurek, D.A.; Farley, K.A.; Stockman, B.J., et al. A new resistance gene, *linB*, conferring resistance to lincosamides by nucleotidylation in *Enterococcus faecium* HM1025. *Antimicrob. Agents Chemother.* **1999**, 43, 925-9.

5. Lüthje, P.; Schwarz, S. Antimicrobial resistance of coagulase-negative staphylococci from bovine subclinical mastitis with particular reference to macrolide–lincosamide resistance phenotypes and genotypes. *J. Antimicrob. Chemother.* **2006**, *57*, 966-9.
6. Sutcliffe, J.; Grebe, T.; Tait-Kamradt, A.; Wondrack, L. Detection of erythromycin-resistant determinants by PCR. *Antimicrob. Agents Chemother.* **1996**, *40*, 2562-6.
7. Allignet, J.; Loncle, V.; El Solh, N. Sequence of a staphylococcal plasmid gene, *vga*, encoding a putative ATP-binding protein involved in resistance to virginiamycin A-like antibiotics. *Gene* **1992**, *117*, 45-51.
8. Loncle, V.; Casetta, A.; Buu-Hoi, A.; El Solh, N. Analysis of pristinamycin-resistant *Staphylococcus epidermidis* isolates responsible for an outbreak in a Parisian hospital. *Antimicrob. Agents Chemother.* **1993**, *37*, 2159-65.
9. Hammerum, A.M.; Jensen, L.B.; Aarestrup, F.M.I. Detection of the *satA* gene and transferability of virginiamycin resistance in *Enterococcus faecium* from food-animals. *FEMS Microbiol. Lett.* **1998**, *168*, 145-51.
10. Allignet, J.; Liassine, N.; El Solh, N. Characterization of a staphylococcal plasmid related to pUB110 and carrying two novel genes, *vatC* and *vgbB*, encoding resistance to streptogramins A and B and similar antibiotics. *Antimicrob. Agents Chemother.* **1998**, *42*, 1794-8.
